# Supplementary material for: Fragment Screening at Adenosine-A3 Receptors in Living Cells Using a Fluorescence-Based Binding Assay
Source: PubMed Central journal article supplement (PMC3456874; doi:10.1016/j.chembiol.2012.07.014), 2012-09-21
Supplement: mmc1.pdf [file mmc1.pdf]

## Supplemental Information

### Fragment Screening

#### at Adenosine-A<sub>3</sub> Receptors in Living Cells Using

#### a Fluorescence-Based Binding Assay

Leigh A. Stoddart, Andrea J. Vernall, Jessica L. Denman, Stephen J. Briddon, Barrie Kellam, and Stephen J. Hill

#### Inventory of Supplemental Information

|                                                                                                                  |     |
|------------------------------------------------------------------------------------------------------------------|-----|
| Supplemental Experimental Procedures and Data Analysis                                                           | S3  |
| Figure S1: Membrane binding of CA200645 can still be observed after 2h incubation                                |     |
| - related to Figure 1                                                                                            | S6  |
| Figure S2: CA200645 as a high affinity antagonist at the adenosine A <sub>1</sub> receptor                       |     |
| - related to Figure 2                                                                                            | S7  |
| Figure S3: A selection of reported adenosine A <sub>3</sub> -receptor selective antagonists                      |     |
| - related to Figure 4                                                                                            | S8  |
| Figure S4. Analysis of fragment screen hits in relation to established adenosine receptor ligands                |     |
| - related to Figure 6                                                                                            | S9  |
| Table S1: Inhibition of CA200645 binding by Maybridge “Rule of Three” library                                    |     |
| - related to Figure 5                                                                                            | S11 |
| Table S2: Binding affinities of 38 Maybridge “Rule of Three” fragments                                           |     |
| - related to Figure 5                                                                                            | S13 |
| Table S3: Binding affinities of DP01095 derivatives at the adenosine A <sub>3</sub> and A <sub>1</sub> receptors |     |
| - related to Figure 6                                                                                            | S14 |
| General chemistry methods                                                                                        | S16 |
| Synthesis and characterization of compounds 1 – 7                                                                | S17 |

|                                                                       |            |
|-----------------------------------------------------------------------|------------|
| <b>Synthesis and characterization of compounds DP 01095, 8, and 9</b> | <b>S20</b> |
| <b>Synthesis and characterization of compounds 10 - 16</b>            | <b>S22</b> |
| <b>Synthesis and characterization of compounds 17 - 23</b>            | <b>S26</b> |
| <b>Supplemental references</b>                                        | <b>S30</b> |

## Supplemental Experimental Procedures

### Calcium mobilization assay.

CHO cells expressing the adenosine A<sub>1</sub> receptor were grown to confluence in black-walled, clear-bottom 96-well plates. On the day of the experiment, medium was removed from each well and replaced with 100  $\mu$ L HEPES-buffered saline solution (HBSS; 25 mM HEPES, 10 mM glucose, 146 mM NaCl, 5 mM KCl, 1 mM MgSO<sub>4</sub>, 2 mM sodium pyruvate, 1.3 mM CaCl<sub>2</sub>, 1.5 mM NaHCO<sub>3</sub>) supplemented with 2.5 mM probenecid, 2.3  $\mu$ M Fluo-4AM and 0.023% Pluronic F-127. Cells were incubated with Fluo-4 containing buffer for 45 min at 37°C in the dark. Cells were then washed twice in HBSS and fresh HBSS with 2.5 mM probenecid with or without CA200645 added to each well and cells incubated for a further 30 min at 37°C in the dark. Plates were then loaded onto a multi-well fluorimetric imaging plate reader (FlexStation; Molecular Devices, Sunnyvale, CA) and fluorescence was measured (excitation, 485 nm; emission, 520 nm) every 1.52 s for 200 s. Either HBSS or HBSS with the required concentration of NECA was added at 15 s).

**Data Analysis.** For the CRE-SPAP gene transcription assay, NECA concentration-response curves in the absence and presence of increasing concentrations of test compounds were globally fit to the following interaction model in Prism5.

$$\text{Response} = \frac{E_{\max} \times [A]}{([A] + EC_{50} \times \left(1 + \frac{[B]}{K_B}\right)^S)}$$

Where  $E_{\max}$  is the maximal response,  $EC_{50}$  is the molar concentration of NECA [A] in the absence of test compound required to generate a response that is 50% of  $E_{\max}$ , [B] is the concentration of test compound,  $K_D$  is the antagonist equilibrium dissociation constant and S is the Schild slope. For the

calcium mobilization experiments, estimated affinity values ( $pK_B$ ) were calculated from the shift of the agonist concentration response curves elicited in the presence of the CA200645 using the following equation:

$$DR = 1 + \frac{[B]}{K_B}$$

Where DR (dose ratio) is the ratio of the agonist concentration required to stimulate an identical response in the presence and absence of antagonist, [B]. As there was a decrease in observed maximal efficacy of NECA in the presence of CA200645, the  $EC_{25}$  value was used to determine the DR.

The association and dissociation kinetic analysis of CA200645 binding to  $A_3AR$  was simultaneously to the following equations:

$$Y = Y_o + (Plateau - Y_o)(1 - e^{-k_{onobs} \cdot t})$$

and

$$Y = (Y_o - Plateau) \cdot e^{-k_{off} \cdot t} + Plateau$$

where  $Y_o$  is the level of CA200645 binding at time (t) zero, Plateau is the level of CA200645 binding at infinite time,  $k_{onobs}$  is the observed rate of association and  $k_{off}$  represents the rate of CA200645 dissociation. To calculate the association rate ( $k_{on}$ ) and the negative logarithm of the equilibrium dissociation constant ( $pK_D$ ) from  $k_{on}$  and  $k_{off}$  the following equations were used:

$$k_{on} = \frac{k_{onobs} - k_{off}}{[CA200645]}$$

and

$$pK_D = -\log\left(\frac{k_{off}}{k_{on}}\right)$$

where  $k_{onobs}$ ,  $k_{on}$  and  $k_{off}$  are as described above.

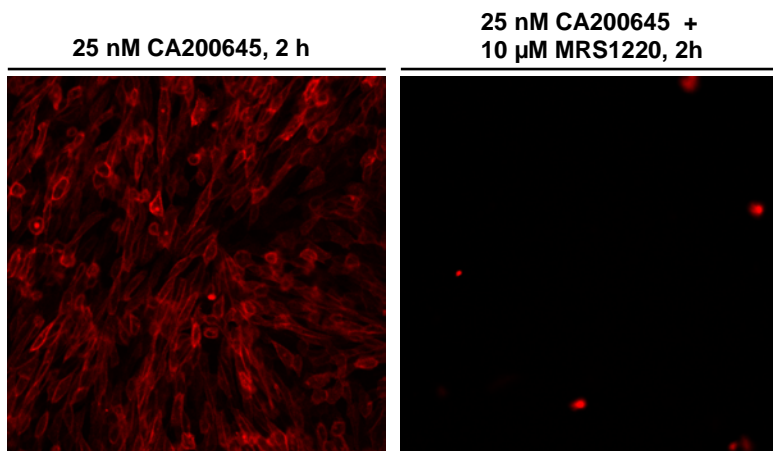

**Figure S1.** Membrane binding of CA200645 can still be observed after 2h incubation

CHO CRE-SPAP cells expressing the  $A_3AR$  receptor were incubated with 25 nM CA200645 in HBSS (left hand panel) or 25 nM CA200645 and 10  $\mu$ M MRS1220 (right hand panel) for 2 h at 37°C. Cells were washed twice in fresh HBSS and images captured automatically using the Ultra confocal plate reader. After 2h, clear membrane binding of CA200645 is still identifiable, with little fluorescent observed within the cells and this is completely blocked in the presence of MRS1220. Images are representative of four experiments performed in duplicate.

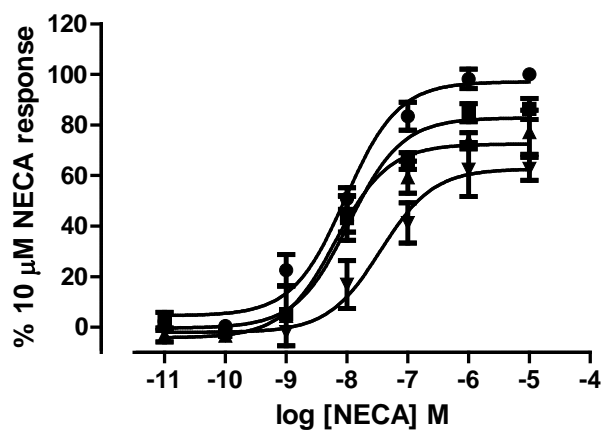

**Figure S2.** CA200645 as a high affinity antagonist at the adenosine A<sub>1</sub> receptor. CHO cells expressing the adenosine A<sub>1</sub> receptor were stimulated with increasing concentrations of NECA (●) and the resulting increase in intracellular calcium measured via Fluo4. The presence of 10 nM (■), 30 nM (▲) and 100 nM (▼) CA200645 caused a shift in the agonist concentration response curve showing that CA200645 but also a depression of the maximum response therefore the method described by Christopoulos et al. (1999) was used to calculate the apparent pK<sub>b</sub> of the antagonist which is 8.29 ± 0.16. Each data point represents mean ± s.e.m. of four experiments performed in triplicate.

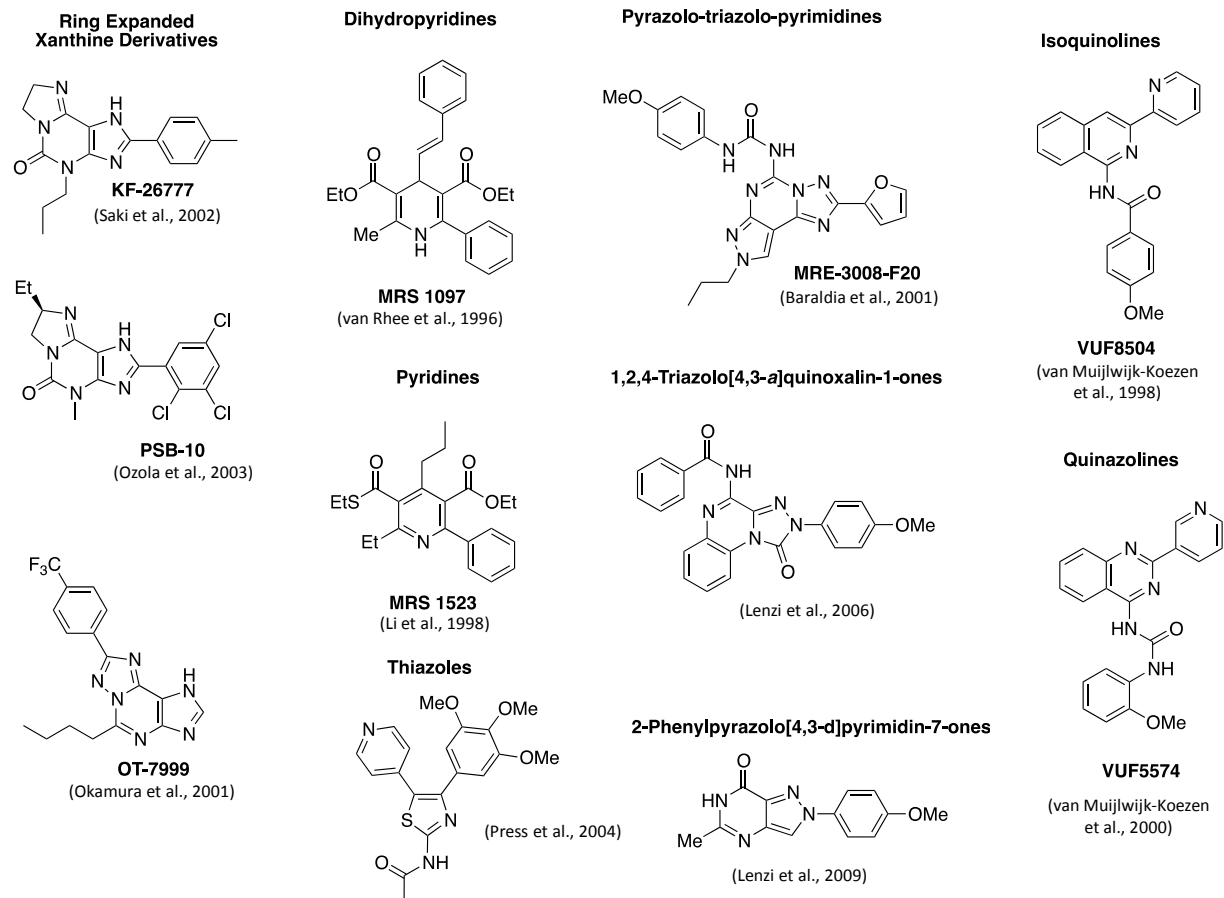

**Figure S3.** A selection of reported adenosine A<sub>3</sub>-receptor selective antagonists.



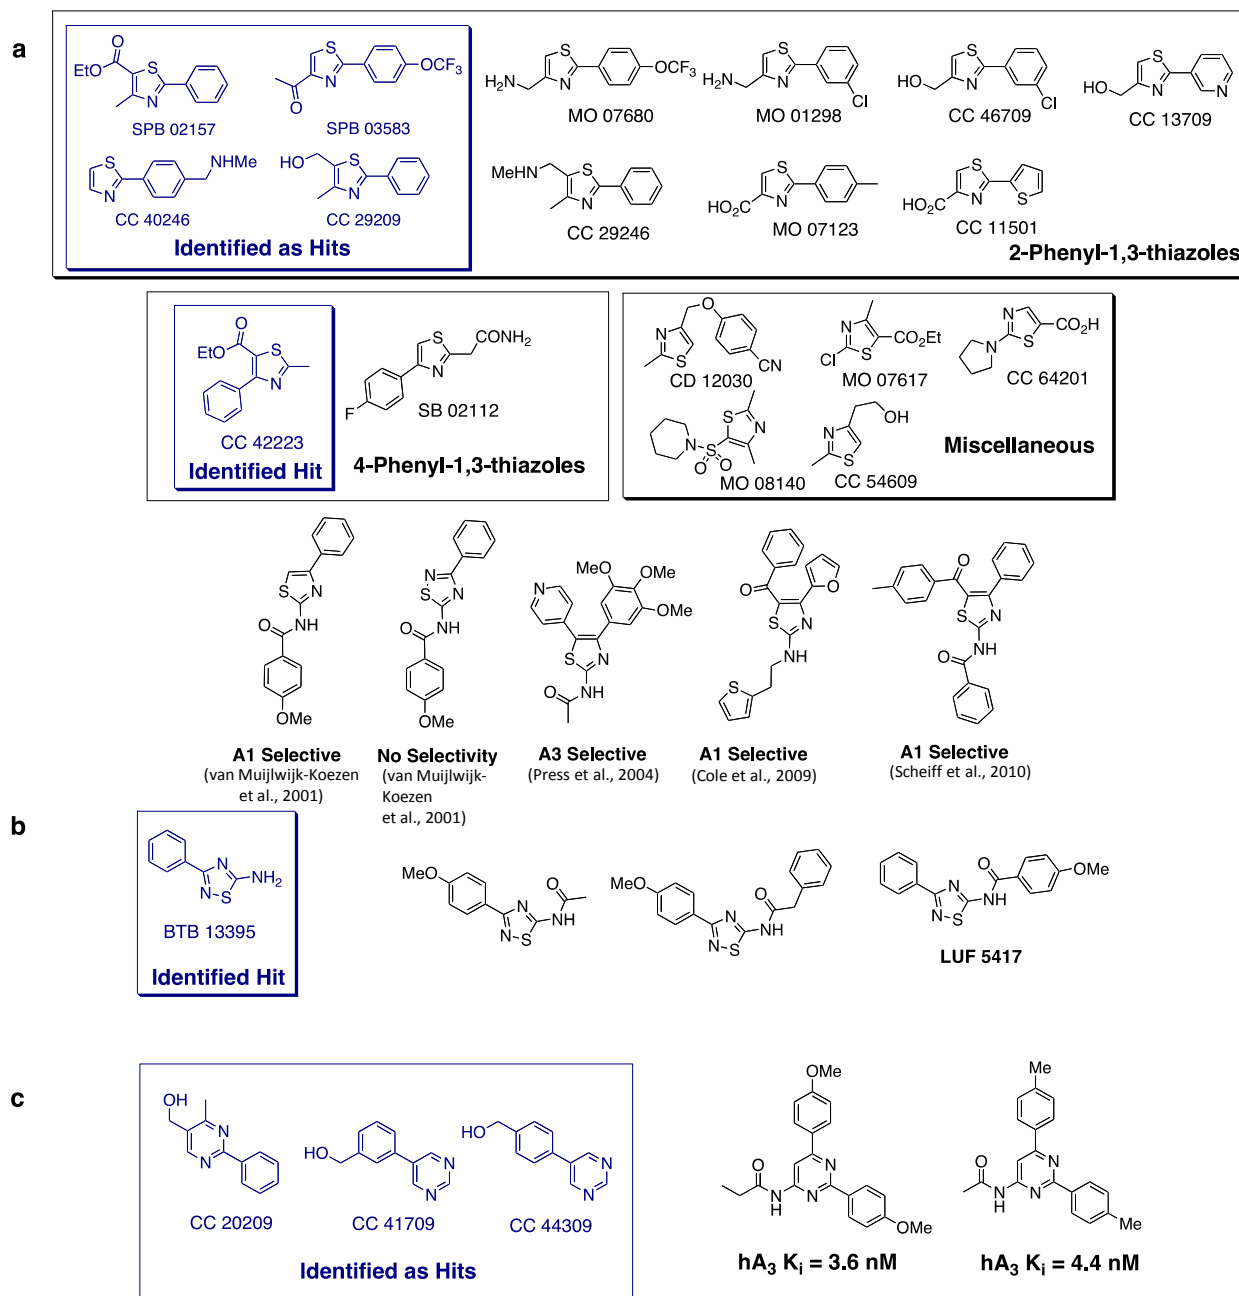

**Figure S4.** Analysis of fragment screen hits in relation to established adenosine receptor ligands.

(a) 18 Thiazole-containing fragments were contained within the 248-member library screened using our live-cell assay. Four out of eleven 2-phenyl-1,3-thiazoles were identified as hits, alongside one of the two 4-phenyl-1,3-thiazoles. The thiazole and thiadiazole ring systems have been recently identified in numerous adenosine receptor antagonists, although there is no direct fragment correlation with any of

the Maybridge Library members we assayed. (b) There was one 1,2,4-thiadiazole member of the 248-member library and this compound, BTB 13395, was identified as a hit. The fragment maps well onto a range of established adenosine  $A_3$ -receptor antagonists recently described in the literature (Jung et al., 2004; van Muijlwijk-Koezen et al., 2001). (c) Fragment CC 20209, the only 2-phenylpyrimidine member of the assayed 248-member library, was successfully identified as a hit. The fragment maps well onto a range of established adenosine  $A_3$ -receptor antagonists recently described in the literature (Yaziji et al., 2011).

**Table S1.** Inhibition of CA200645 binding by a library of fragments from a Maybridge “Rule of Three” library. Values obtained in a fluorescent adenosine receptor antagonist binding assay using whole, live cells expressing the adenosine A<sub>3</sub> receptor. Values quoted are % of control wells (wells containing 1% DMSO and 25 nM CA200645). All compounds were tested at 1 mM. Compounds selected for further screening are indicated by an asterisk (\*) and when CA200645 binding was within 10% of the inhibition observed with the control compound (1 μM MRS1220) included in each plate.

| Maybridge compound code | % of CA200645 binding (% DMSO control) | Maybridge compound code | % of CA200645 binding (% DMSO control) | Maybridge compound code | % of CA200645 binding (% DMSO control) | Maybridge compound code | % of CA200645 binding (% DMSO control) |
|-------------------------|----------------------------------------|-------------------------|----------------------------------------|-------------------------|----------------------------------------|-------------------------|----------------------------------------|
| AC 1258                 | 95.05                                  | CC 12701                | 58.41                                  | CC 49909                | 61.21                                  | MO 08137                | 110.72                                 |
| AC 30454                | 13.01*                                 | CC 12801                | 77.99                                  | CC 50209                | 57.90                                  | MO 08148                | 108.00                                 |
| AC 34875                | 10.43*                                 | CC 13209                | 66.20                                  | CC 50346                | 115.32                                 | MO 08152                | 98.91                                  |
| AW 00189                | 19.97*                                 | CC 13709                | 50.75                                  | CC 50809                | 100.83                                 | MO 08153                | 110.21                                 |
| AW 00326                | 39.36                                  | CC 17418                | 52.77                                  | CC 53409                | 102.81                                 | MO 08155                | 89.64                                  |
| AW 00354                | 71.86                                  | CC 17446                | 93.96                                  | CC 53746                | 85.91                                  | MO 08164                | 93.18                                  |
| AW 00496                | 16.33*                                 | CC 18413                | 48.48                                  | CC 54609                | 54.24                                  | MO 08166                | 94.37                                  |
| AW 00512                | 26.92                                  | CC 18509                | 36.82                                  | CC 55813                | 110.02                                 | MO 08172                | 36.97*                                 |
| AW 00937                | 19.67*                                 | CC 20209                | 21.54*                                 | CC 57846                | 96.64                                  | MO 08173                | 77.22                                  |
| BTB 02219               | 64.59                                  | CC 20309                | 70.02                                  | CC 64201                | 82.85                                  | NRB 04027               | 78.61                                  |
| BTB 02522               | 88.37                                  | CC 21101                | 74.56                                  | CC 64513                | 75.68                                  | RF 03948                | 122.21                                 |
| BTB 03488               | 36.84                                  | CC 21901                | 83.90                                  | CC 67423                | 69.43                                  | RH 00001                | 92.40                                  |
| BTB 03690               | 11.98*                                 | CC 23109                | 19.07*                                 | CD 02568                | 51.84                                  | RH 01364                | 20.38*                                 |
| BTB 03853               | 40.89                                  | CC 24201                | 14.26*                                 | CD 07751                | 88.29                                  | RH 01808                | 83.18                                  |
| BTB 04061               | 17.41*                                 | CC 24301                | 25.41                                  | CD 09967                | 102.68                                 | RH 01882                | 88.76                                  |
| BTB 05603               | 89.62                                  | CC 25501                | 25.44*                                 | SEW 04290               | 89.05                                  | RH 01995                | 61.95                                  |
| BTB 06663               | 79.41                                  | CC 25801                | 20.41*                                 | CD 12030                | 92.79                                  | RH 02036                | 61.87                                  |
| BTB 06837               | 77.82                                  | CC 26713                | 52.78                                  | RF 05447                | 78.10                                  | RH 02136                | 61.83                                  |
| BTB 07001               | 14.76*                                 | CC27201                 | 94.09                                  | DP 01095                | 36.30*                                 | SB 00671                | 82.24                                  |
| BTB 07148               | 92.25                                  | CC 29209                | 21.34*                                 | GK 03755                | 108.28                                 | CC 40996                | 38.59                                  |
| BTB 07340               | 10.27*                                 | CC 29246                | 35.78                                  | HAN 00271               | 118.92                                 | SB 01274                | 81.46                                  |
| BTB 08555               | 42.65                                  | CC 29709                | 75.52                                  | JFD 03933               | 100.25                                 | SB 01424                | 39.40                                  |
| BTB 09194               | 93.21                                  | CC 30513                | 43.71                                  | MO 07916                | 72.66                                  | SB 01670                | 60.99                                  |
| BTB 09309               | 42.60                                  | CC 33809                | 66.56                                  | KM 00154                | 55.02                                  | SB 01717                | 69.03                                  |
| BTB 09341               | 65.67                                  | CC 33946                | 31.28                                  | KM 00452                | 74.09                                  | SB 01748                | 71.38                                  |
| BTB 09397               | 58.61                                  | CC 34001                | 90.25                                  | KM 00835                | 95.26                                  | SB 01855                | 70.42                                  |

|           |        |  |          |        |  |          |        |  |           |        |
|-----------|--------|--|----------|--------|--|----------|--------|--|-----------|--------|
| MO 08140  | 65.73  |  | CC 34046 | 66.09  |  | KM 01136 | 134.47 |  | SB 01999  | 96.77  |
| BTB 09912 | 45.44  |  | CC 36009 | 101.90 |  | KM 01166 | 86.56  |  | SB 02020  | 79.40  |
| BTB 10644 | 71.05  |  | CC 38113 | 83.88  |  | KM 01548 | 28.42* |  | SB 02033  | 67.46  |
| BTB 12321 | 72.59  |  | CC 39001 | 22.96* |  | KM 01765 | 40.56  |  | SB 02112  | 76.37  |
| BTB 12329 | 21.55* |  | CC 40001 | 59.60  |  | KM 02063 | 87.50  |  | SB 02117  | 88.80  |
| BTB 12548 | 95.28  |  | CC 40109 | 105.35 |  | KM 02425 | 64.35  |  | SEW 00597 | 96.57  |
| BTB 12757 | 64.76  |  | CC 40146 | 124.11 |  | KM 03308 | 65.26  |  | SEW 02215 | 61.36  |
| BTB 13068 | 14.01* |  | CC 40246 | 32.45* |  | KM 03728 | 64.07  |  | SEW 02254 | 65.79  |
| BTB 13395 | 24.90* |  | CC 41401 | 70.48  |  | KM 05339 | 97.92  |  | SEW 02362 | 61.06  |
| BTB 13431 | 107.27 |  | CC 41709 | 47.06* |  | KM 08328 | 73.52  |  | SEW 02754 | 90.10  |
| BTB 14321 | 57.37  |  | CC 42223 | 38.60* |  | KM 10090 | 38.61  |  | SEW 03073 | 102.15 |
| BTB 15120 | 80.31  |  | CC 43109 | 95.50  |  | KM 10848 | 132.75 |  | SEW 03743 | 70.37  |
| CC 00075  | 73.04  |  | CC 43214 | 54.66  |  | MO 00094 | 89.85  |  | SEW 03999 | 64.42  |
| CC 00092  | 59.30  |  | CC 43309 | 78.15  |  | MO 00397 | 33.91  |  | SEW 04032 | 71.63  |
| CC 00409  | 43.00  |  | CC 43314 | 85.95  |  | MO 00719 | 59.42  |  | SEW 04033 | 76.36  |
| CC 00509  | 55.01  |  | CC44201  | 82.34  |  | MO 00765 | 84.62  |  | SEW 04036 | 38.37  |
| CC 00513  | 40.17  |  | CC 44309 | 82.76  |  | MO 00936 | 32.86  |  | SP 00291  | 43.90  |
| CC 00546  | 108.62 |  | CC 44546 | 55.01  |  | MO 00997 | 31.10* |  | SPB 01074 | 21.40* |
| CC 00801  | 61.66  |  | CC 45309 | 111.63 |  | MO 01145 | 76.94  |  | SPB 02010 | 66.06  |
| CC 00901  | 49.37  |  | CC 45522 | 81.83  |  | MO 01157 | 62.81  |  | SPB 02157 | 28.44* |
| CC 01309  | 96.94  |  | CC 45609 | 88.15  |  | MO 01158 | 51.29  |  | SPB 03583 | 27.22* |
| CC 01409  | 77.19  |  | CC 45613 | 75.92  |  | MO 01169 | 122.68 |  | SPB 03996 | 22.32* |
| CC 01418  | 51.43  |  | CC 45801 | 88.15  |  | MO 01174 | 94.87  |  | SPB 06632 | 57.59  |
| CC 01509  | 102.54 |  | CC 46201 | 60.75  |  | MO 01175 | 117.31 |  | SPB 06834 | 98.24  |
| CC 01513  | 75.22  |  | CC 46609 | 77.47  |  | MO 01209 | 81.84  |  | TL 00276  | 28.46* |
| CC 04401  | 141.62 |  | CC 46646 | 76.92  |  | MO 01298 | 77.15  |  | TL 00555  | 34.52  |
| CC 04601  | 51.62  |  | CC 46709 | 56.92  |  | MO 07029 | 113.86 |  | TL 00757  | 56.63  |
| CC 04701  | 90.69  |  | CC 47109 | 61.14  |  | MO 07058 | 41.53  |  | TL 00770  | 23.53* |
| CC 05601  | 62.71  |  | CC 47414 | 75.92  |  | MO 07116 | 91.54  |  | TL 01004  | 79.78  |
| CC 06309  | 72.16  |  | CC 47809 | 48.21  |  | MO 07123 | 40.17  |  | TL 01028  | 36.51  |
| CC 06346  | 70.68  |  | CC 48009 | 42.44* |  | MO 07352 | 50.66  |  | XBX 00309 | 49.78  |
| CC 09009  | 17.89* |  | CC 48401 | 70.29  |  | MO 07617 | 69.00  |  | AC 29603  | 64.28  |
| CC 10501  | 41.28  |  | CC 48446 | 79.86  |  | MO 07680 | 68.38  |  | SEW 05612 | 24.67* |
| CC 11501  | 48.86  |  | CC 48746 | 37.19* |  | MO 07692 | 92.88  |  | KM 07581  | 115.31 |
| CC 12046  | 27.89* |  | CC 48909 | 73.18  |  | MO 07745 | 56.61  |  | CC 41546  | 98.24  |
| CC 12413  | 53.63  |  | CC 49701 | 76.73  |  | MO 08136 | 41.02  |  | MO 08160  | 88.72  |

**Table S2.** Binding affinities of 38 Maybridge “Rule of Three” fragments at the adenosine A<sub>3</sub> receptor. Values obtained in a fluorescent adenosine receptor antagonist binding assay using whole, live cells expressing the adenosine A<sub>3</sub> receptor. Values represent mean  $\pm$  s.e.m from 3 separate experiments.

| Ranking | Fragment code | pK <sub>i</sub> | Ranking | Fragment code | pK <sub>i</sub> |
|---------|---------------|-----------------|---------|---------------|-----------------|
| 1       | DP 01095      | 6.44 $\pm$ 0.31 | 20      | CC 23109      | 4.86 $\pm$ 0.38 |
| 2       | MO 00997      | 6.10 $\pm$ 0.31 | 21      | SPB 03583     | 4.86 $\pm$ 0.50 |
| 3       | TL 00770      | 6.00 $\pm$ 0.17 | 22      | SPB 03996     | 4.84 $\pm$ 0.50 |
| 4       | AC 34875      | 5.92 $\pm$ 0.45 | 23      | BTB 12329     | 4.80 $\pm$ 0.24 |
| 5       | BTB 07340     | 5.53 $\pm$ 0.13 | 24      | SPB 02157     | 4.78 $\pm$ 0.34 |
| 6       | AC 30454      | 5.50 $\pm$ 0.35 | 25      | CC 09009      | 4.67 $\pm$ 0.30 |
| 7       | CC 20209      | 5.47 $\pm$ 0.09 | 26      | MO 08172      | 4.65 $\pm$ 0.44 |
| 8       | CC 39001      | 5.43 $\pm$ 0.05 | 27      | CC 40246      | 4.61 $\pm$ 0.18 |
| 9       | CC 25501      | 5.26 $\pm$ 0.13 | 28      | BTB 04061     | 4.49 $\pm$ 0.49 |
| 10      | AW 00937      | 5.25 $\pm$ 0.11 | 29      | CC 29209      | 4.47 $\pm$ 0.50 |
| 11      | BTB 13068     | 5.23 $\pm$ 0.16 | 30      | BTB 07001     | 4.40 $\pm$ 0.21 |
| 12      | TL 00276      | 5.23 $\pm$ 0.24 | 31      | SPB 01074     | 4.38 $\pm$ 0.20 |
| 13      | CC 48746      | 5.23 $\pm$ 0.98 | 32      | RH 01364      | 4.32 $\pm$ 0.20 |
| 14      | KM 01548      | 5.19 $\pm$ 0.72 | 33      | AW 00189      | 4.21 $\pm$ 0.36 |
| 15      | CC 24201      | 5.09 $\pm$ 0.37 | 34      | AW 00496      | 3.97 $\pm$ 0.87 |
| 16      | SEW 05612     | 5.08 $\pm$ 0.20 | 35      | CC 12046      | >3              |
| 17      | BTB 13395     | 5.02 $\pm$ 0.28 | 36      | CC 25801      | >3              |
| 18      | CC 48009      | 4.99 $\pm$ 0.20 | 37      | CC 41709      | >3              |
| 19      | BTB 03690     | 4.96 $\pm$ 0.29 | 38      | CC 42223      | >3              |

**Table S3.** Binding affinities of DP01095 derivatives at the adenosine A<sub>3</sub> and A<sub>1</sub> receptors. Values obtained in a fluorescent adenosine receptor antagonist binding assay using whole, live cells expressing the adenosine A<sub>1</sub> or A<sub>3</sub> receptor. % inhibition values are quoted where less than 50% inhibition of total binding was observed at the top concentration of compound tested. Values represent mean  $\pm$  s.e.m from *n* separate experiments.

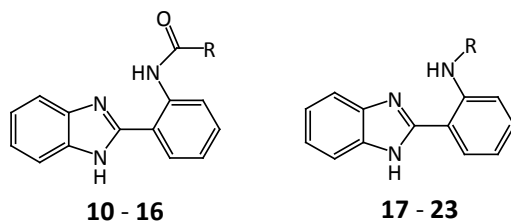

| Compound | R | A <sub>3</sub>  |                |   | A <sub>1</sub>  |                 |   |
|----------|---|-----------------|----------------|---|-----------------|-----------------|---|
|          |   | pK <sub>i</sub> | % inhibition   | n | pK <sub>i</sub> | % inhibition    | n |
| 10       |   | 7.01 $\pm$ 0.10 |                | 4 |                 | 38.9 $\pm$ 8.3  | 4 |
| 11       |   | 6.78 $\pm$ 0.19 |                | 4 |                 | 40.6 $\pm$ 7.3  | 4 |
| 12       |   | 6.59 $\pm$ 0.23 |                | 4 |                 | 47.9 $\pm$ 9.7  | 4 |
| 13       |   | 6.27 $\pm$ 0.17 |                | 5 |                 | 28.8 $\pm$ 18.3 | 4 |
| 14       |   |                 | 48.2 $\pm$ 2.2 | 4 |                 |                 |   |
| 15       |   |                 | 36.8 $\pm$ 2.3 | 4 |                 |                 |   |
| 16       |   |                 | 43.0 $\pm$ 4.5 | 4 |                 |                 |   |
| 17       |   | 6.27 $\pm$ 0.05 |                | 5 |                 | 34.2 $\pm$ 5.3  | 4 |

|    |                                                                                   |  |                |   |  |                |   |
|----|-----------------------------------------------------------------------------------|--|----------------|---|--|----------------|---|
| 18 |  |  | $39.0 \pm 9.5$ | 5 |  | $14.5 \pm 5.5$ | 4 |
| 19 |  |  | $24.0 \pm 4.1$ | 4 |  |                |   |
| 20 |  |  | $39.0 \pm 4.9$ | 4 |  |                |   |
| 21 |  |  | $34.2 \pm 5.9$ | 4 |  |                |   |
| 22 |  |  | $4.9 \pm 4.7$  | 4 |  |                |   |
| 23 |  |  | $6.5 \pm 3.8$  | 4 |  |                |   |

## GENERAL CHEMISTRY METHODS

Chemicals and solvents of an analytical grade were purchased from commercial suppliers and used without further purification. Reactions were monitored and analyzed by thin layer chromatography on pre-coated aluminium-backed plates (Merck Kieselgel 60 F254) with visualization using UV light (254 and 366 nm) or staining with  $\text{KMnO}_4$  dip. Flash column chromatography was performed using Merck Kieselgel 60, 230-400 mesh (Merck KgaA) on a Biotage Flashmaster II system. Microwave reactions were carried out in a CEM Discover system fitted with an Explorer 48 autosampler. A dynamic program was used to control the microwave conditions, in which the maximum temperature, pressure, and/or power limit could be specified. Melting points (mp) were recorded on a Mettler Toledo MP50 melting point system and are uncorrected.  $^1\text{H}$  NMR spectra were recorded on a Bruker-AV 400 at 400.13 MHz or a Bruker AV(II) 500 at 503.13 MHz.  $^{13}\text{C}$  NMR spectra were recorded on a Bruker AV(II) 500 with a dual (CH) cryoprobe at 125.8 MHz. Solvents used for NMR analysis (reference peaks listed) were  $\text{DMSO-}d_6$  ( $(\text{CHD}_2)_2\text{SO}$  at  $\delta_{\text{H}}$  2.50 ppm,  $(\text{CD}_3)_2\text{SO}$  at 39.52 ppm) and  $\text{CDCl}_3$  ( $\text{CHCl}_3$  at  $\delta_{\text{H}}$  7.26 ppm,  $\text{CDCl}_3$  at 77.16). Chemical shifts ( $\delta$ ) are recorded in parts per million (ppm). The peaks are described as a singlet (s), doublet (d), doublet of doublets (dd), triplet (t), quadruplet (q), broad (br), multiplet (m), and coupling constants ( $J$ ) are recorded in Hz. High resolution mass spectrometry (HRMS) – time of flight, electrospray (TOF ES +/-) were recorded on a Waters 2795 separation module/micromass LCT platform. RP-HPLC was performed using a Waters 2767 sample manager, Waters 2525 binary gradient module, and visualized at 254 nm and 366 nm with a Waters 2487 dual wavelength absorbance detector. Spectra were analyzed using MassLynx. Analytical reversed-phase high-performance liquid chromatography (RP-HPLC) was used to determine that the purity of compounds tested in biological systems was  $\geq 95\%$  (the retention times ( $R_t$ ) of these compounds are reported). Analytical RP-HPLC was performed using a YMC-Pack C8 column (150 mm  $\times$  4.6 mm  $\times$  5  $\mu$  m) at a flow rate of 1 mL/min, and using a method of 0 min 10%B, 1 min 10%B, linear gradient to 20 min 95%B, 21 min 95%B, followed by column re-equilibration to 10%B in solvent A (solvent A = 0.05% trifluoroacetic acid in



H<sub>2</sub>O, solvent B = 0.05% trifluoroacetic acid in 9:1 v:v CH<sub>3</sub>CN:H<sub>2</sub>O).

### Synthesis and characterization of compounds 1 – 7

3-Aminoquinoline (**5**) and 1-(4-methoxyphenyl)-1*H*-imidazole (**6**) were purchased from Sigma Aldrich.

#### *N*-[2-(4-Methoxyphenyl)-1-oxo-1*H*,2*H*-[1,2,4]triazolo[4,3-*a*]quinoxalin-4-yl]benzamide **1**

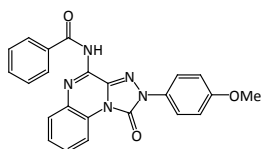

Synthesized according to literature.<sup>3</sup> mp: 202 - 204 °C (lit. 203–205 °C).<sup>3</sup> <sup>1</sup>H NMR (400 MHz, CDCl<sub>3</sub>) δ 3.86 (s, 3H), 7.02 (d, *J* = 9.3 Hz, 2H), 7.50 – 7.65 (m, 5H), 7.93–7.96 (m, 3H), 8.01 (d, *J* = 7.5 Hz, 2H), 8.84 (d, *J* = 7.5 Hz, 1H), 8.93 (s, 1H). HRMS (*m/z*): [M+H]<sup>+</sup> calcd. for C<sub>23</sub>H<sub>18</sub>N<sub>5</sub>O<sub>3</sub>, 412.1404; found, 412.1393. Analytical HPLC R<sub>t</sub> = 17.77 min.

#### 2-(4-Methoxyphenyl)-5*H*-[1,2,4]triazolo[4,3-*a*]quinoxaline-1,4-dione **2**

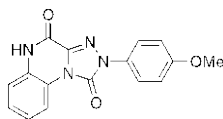

Synthesized according to literature.<sup>4</sup> mp: > 300 °C (lit. > 300 °C).<sup>4</sup> <sup>1</sup>H NMR (400 MHz, DMSO-*d*<sub>6</sub>) δ 3.81 (s, 3H), 7.11 (d, *J* = 9.1 Hz, 2H), 7.25-7.37 (m, 3H), 7.87 (d, *J* = 9.1 Hz, 2H), 8.60 (d, *J* = 7.9 Hz, 1H), 11.94 (s, 1H). HRMS (*m/z*): [M+H]<sup>+</sup> calcd. for C<sub>16</sub>H<sub>13</sub>N<sub>4</sub>O<sub>3</sub>, 309.0982; found, 309.0995. Analytical HPLC R<sub>t</sub> = 14.47 min.

(Z)-3-[2-(4-Methoxyphenyl)hydrazin-1-ylidene]-1,4-dihydroquinoxalin-2-one **3**

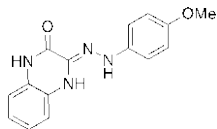

Synthesized according to literature.<sup>4</sup> mp: 230–231 °C (lit. 231–233 °C).<sup>4</sup> <sup>1</sup>H NMR (400 MHz, DMSO-*d*<sub>6</sub>) δ 3.65 (s, 3H, tautomer A), 3.70 (s, 3H, tautomer B), 6.76–7.26 (m, 16H, tautomer A and B), 7.44 (d, *J* = 3.5 Hz, tautomer B, 1H), 8.48 (s, 1H, tautomer A), 9.32 (d, *J* = 3.5 Hz, tautomer B, 1H), 9.45 (s, 1H, tautomer A), 11.00 (s, 1H, tautomer A), 12.22 (s, 1H, tautomer B). HRMS (*m/z*): [M+H]<sup>+</sup> calcd. for C<sub>15</sub>H<sub>15</sub>N<sub>4</sub>O<sub>2</sub>, 283.1190; found 283.1198. Analytical HPLC *R*<sub>t</sub> = 13.15 min.

*N*-(Quinolin-3-yl)benzamide **4**

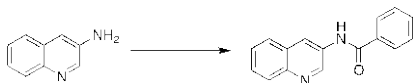

To a solution of 3-aminoquinoline (0.35 mmol) in *N,N*-dimethylformamide (DMF) (2 mL) was added a solution of benzoic acid (0.48 mmol), 2-(7-aza-1*H*-benzotriazole-1-yl)-1,1,3,3-tetramethyluronium hexafluorophosphate (HATU) (0.48 mmol), and *N,N*-diisopropylethylamine (DIEA) (1.9 mmol) in DMF (1 mL). The solution was stirred for 6 h at rt, then ethyl acetate and water were added. The organic layer was separated and washed with saturated aqueous sodium bicarbonate, saturated brine, and water, dried over magnesium sulfate, and evaporated to give the crude product. Recrystallization gave the pure product **4** (56 mg, 65%) as pale yellow crystals. mp: 199–200 °C (lit. 198–199 °C).<sup>5</sup> <sup>1</sup>H NMR (400 MHz, DMSO-*d*<sub>6</sub>) δ 7.54–7.67 (m, 5H), 7.95 (d, *J* = 8.2 Hz, 1H), 8.01 (d, *J* = 8.4 Hz, 1H), 8.08 (m, 2H), 8.90 (d, *J* = 2.4 Hz, 1H), 9.22 (d, *J* = 2.5 Hz, 1H), 10.74 (s, 1H); <sup>13</sup>C NMR (DMSO-*d*<sub>6</sub>) δ 123.37, 126.99, 127.80, 127.82, 127.97, 128.49, 128.62, 131.92, 133.00, 134.39, 144.45, 145.54, 166.22. HRMS (*m/z*): [M+H]<sup>+</sup> calcd. for C<sub>16</sub>H<sub>13</sub>N<sub>2</sub>O, 249.1028; found, 249.1035. Analytical RP-HPLC *R*<sub>t</sub> = 11.14 min.

*N*-(4-Methoxyphenyl)acetamide **7**

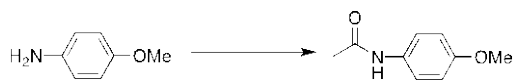

4-Methoxyaniline (1 mmol) was dissolved in ethyl acetate (5 mL) and DIEA (7 mmol), followed by addition of acetic anhydride (5 mmol). The reaction was stirred at room temperature overnight. The solvent was removed under reduced pressure and the residue dissolved in ethyl acetate. The organics were washed three times with water, dried over magnesium sulfate, and the solvent evaporated under reduced pressure. The product was crystallized from petroleum ether/ethyl acetate to give **7** (53 mg, 32%) as pale purple crystals. mp: 127–128 °C (lit. 126–127 °C).<sup>6</sup> <sup>1</sup>H NMR (400 MHz, DMSO-*d*<sub>6</sub>) δ 1.99 (s, 3H), 3.71 (s, 3H), 6.85 (d, *J* = 9.1 Hz, 2H), 7.47 (d, *J* = 9.1 Hz, 2H), 9.76 (s, 1H). HRMS (*m/z*): [M+H]<sup>+</sup> calcd. for C<sub>9</sub>H<sub>11</sub>NO<sub>2</sub>, 166.0868; found, 166.0858. Analytical RP-HPLC R<sub>t</sub> = 10.14 min.

## Synthesis and characterization of compounds DP 01095, 8, and 9

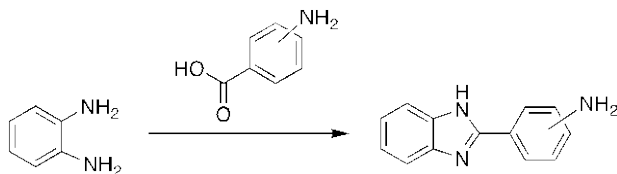

**General Procedure A:** *o*-Phenylenediamine (0.6 mmol) and the amino benzoic acid (0.65 mmol) were combined with polyphosphoric acid (2 g), and the resulting paste heated at 180 °C for 18 h. The mixture was cooled to 80-90 °C, poured into cold water, and adjusted to pH 9-10 by addition of 2M NaOH. The aqueous solution was extracted three times with ethyl acetate, the organic layers combined, dried over magnesium sulfate, and evaporated to give the crude reaction product. This was purified by flash silica column chromatography eluting with 0 to 10% methanol in dichloromethane with 1% triethylamine. After evaporation of the solvent from the desired column fractions, 3M HCl in methanol was added, and the product was recrystallized as the hydrochloride salt.

### 2-(1*H*-Benzimidazol-2-yl)aniline hydrochloride DP 01095

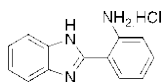

*o*-Phenylenediamine (30 mmol), 2-amino benzoic acid (30 mmol), and polyphosphoric acid (100 g) gave DP01095 (3.449 g, 55%) as a pale brown solid according to a scaled-up General Procedure A. mp: decomposed > 280 °C. <sup>1</sup>H NMR (500 MHz, DMSO-*d*<sub>6</sub>) δ 6.66 (t, *J* = 8.1 Hz, 1H), 6.85 (dd, *J* = 1.0, 8.3 Hz, 1H), 7.14–7.23 (m, 3H), 7.59 (br m, 2H), 7.86 (dd, *J* = 1.4, 7.9 Hz, 1H), 12.70 (br s, 1H). <sup>13</sup>C NMR (DMSO-*d*<sub>6</sub>) δ 110.05, 110.92, 114.99, 116.13, 118.18, 121.51, 122.31, 127.28, 130.43, 133.55, 143.02, 148.27, 152.57. HRMS (*m/z*): [M+H]<sup>+</sup> calcd. for C<sub>13</sub>H<sub>12</sub>N<sub>3</sub>, 210.1026; found, 210.1016. Analytical RP-

HPLC  $R_t = 8.94$  min.

3-(1*H*-Benzimidazol-2-yl)aniline hydrochloride **8**.

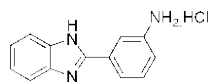

*o*-Phenylenediamine and 3-amino benzoic acid gave **8** (47 mg, 37%) as green crystals according to General Procedure A. mp: decomposed > 295 °C.  $^1\text{H}$  NMR (500 MHz,  $\text{DMSO-}d_6$ )  $\delta$  7.52 (br m, 1H), 7.57 (m, 2H), 7.69 (t,  $J = 7.9$  Hz, 1H), 7.86 (m, 2H), 8.02 (br s, 1H), 8.17 (br m, 1H).  $^{13}\text{C}$  NMR ( $\text{DMSO-}d_6$ )  $\delta$  114.15, 119.32, 123.97, 124.51, 125.09, 126.07, 130.91, 132.01, 138.63, 148.11. HRMS ( $m/z$ ):  $[\text{M}+\text{H}]^+$  calcd. for  $\text{C}_{13}\text{H}_{12}\text{N}_3$ , 210.1026; found, 210.1030. Analytical RP-HPLC  $R_t = 7.68$  min.

4-(1*H*-Benzimidazol-2-yl)aniline hydrochloride **9**.

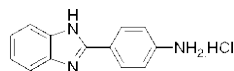

*o*-Phenylenediamine and 4-amino benzoic acid gave **9** (94 mg, 75%) as a yellow solid according to General Procedure A. mp: decomposed > 295 °C.  $^1\text{H}$  NMR (500 MHz,  $\text{DMSO-}d_6$ )  $\delta$  6.89 (d,  $J = 8.8$  Hz, 2H), 7.47 (m, 2H), 7.73 (m, 2H), 8.19 (d,  $J = 8.9$  Hz, 2H).  $^{13}\text{C}$  NMR ( $\text{DMSO-}d_6$ )  $\delta$  109.78, 113.22, 114.98, 125.25, 130.02, 131.47, 149.38, 151.95. HRMS ( $m/z$ ):  $[\text{M}+\text{H}]^+$  calcd. for  $\text{C}_{13}\text{H}_{12}\text{N}_3$ , 210.1026; found, 210.1023. Analytical RP-HPLC  $R_t = 8.92$  min.

## Synthesis and characterization of compounds 10 – 16

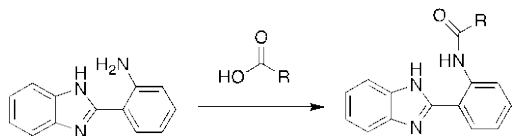

**General Procedure B.** To a solution of 2-(1*H*-benzimidazol-2-yl)aniline DP 01095 (0.24 mmol) in DMF (0.5 mL) was added a solution of the carboxylic acid (0.48 mmol), HATU (0.48 mmol), and DIEA (1.9 mmol) in DMF (1 mL). The solution was stirred for 6 h at rt, evaporated under reduced pressure to remove most of the DMF, and then ethyl acetate and water were added. The organic layer was separated and washed with saturated aqueous sodium bicarbonate, saturated brine, and water, dried over magnesium sulfate, and evaporated to give the crude product. This residue was purified by flash silica column chromatography eluting with 0-10% methanol in dichloromethane, and then recrystallized to give the desired product.

### *N*-(2-(1*H*-Benzimidazol-2-yl)phenyl)nicotinamide **10**

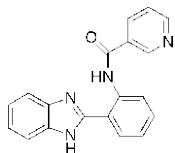

Nicotinic acid gave **10** (19 mg, 25%) as a white solid according to General Procedure B. mp: 261 °C.; <sup>1</sup>H NMR (500 MHz, DMSO-*d*<sub>6</sub>) δ 7.34 (m, 3H), 7.57 (t, *J* = 7.9 Hz, 1H), 7.64 (br m, 1H), 7.76 (m, 2H), 8.21 (dd, *J* = 1.4, 8.0 Hz, 1H), 8.56 (dt, *J* = 1.7, 2.3, 8.0 Hz, 1H), 8.86 (dd, *J* = 1.6, 4.8 Hz, 1H), 8.90 (dd, *J* = 1.0, 8.4 Hz, 1H), 9.39 (dd, *J* = 0.7, 2.3 Hz, 1H), 13.33 (br s, 1H), 14.21 (s, 1H). <sup>13</sup>C NMR (DMSO-*d*<sub>6</sub>) δ 111.79, 115.79, 118.22, 120.05, 122.64, 123.55, 123.76, 124.08, 127.36, 130.45, 130.97, 133.39, 135.04, 138.17, 141.79, 148.69, 150.93, 152.65, 163.51. HRMS (*m/z*): [M+H]<sup>+</sup> calcd. for C<sub>19</sub>H<sub>15</sub>N<sub>4</sub>O, 315.1240; found, 315.1260. Analytical RP-HPLC R<sub>t</sub> = 10.12 min.

*N*-(2-(1*H*-Benzimidazol-2-yl)phenyl)furan-2-carboxamide **11**

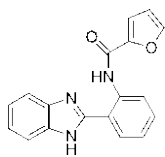

2-Furoic acid gave **11** (17 mg, 23%) as a white solid according to General Procedure B. mp: 263–265 °C. <sup>1</sup>H NMR (500 MHz, DMSO-*d*<sub>6</sub>) δ 6.80 (dd, *J* = 1.7, 3. Hz, 1H), 7.32 (m, 3H), 7.39 (dd, *J* = 0.7, 3.5 Hz, 1H), 7.54 (m, 1H), 7.62 (m, 1H), 7.89 (d, *J* = 7.2 Hz, 1H), 8.18 (m, 1H), 8.18 (dd, *J* = 1.4, 8.0 Hz, 1H), 8.84 (dd, *J* = 1.0, 8.4 Hz, 1H), 13.25 (br s, 1H), 14.18 (s, 1H). <sup>13</sup>C NMR (DMSO-*d*<sub>6</sub>) δ 111.28, 112.34, 114.69, 115.29, 118.37, 119.72, 122.06, 122.91, 123.30, 127.01, 130.51, 133.18, 137.73, 141.68, 146.01, 147.69, 150.50, 155.93. HRMS (*m/z*): [M+H]<sup>+</sup> calcd. for C<sub>18</sub>H<sub>14</sub>N<sub>3</sub>O<sub>2</sub>, 304.1081; found, 304.1068. Analytical RP-HPLC R<sub>t</sub> = 12.09 min.

*N*-(2-(1*H*-Benzimidazol-2-yl)phenyl)thiophene-2-carboxamide **12**

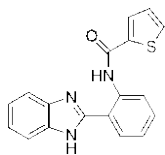

Thiophene-2-carboxylic acid gave **12** (15 mg, 20%) as a white solid according to General Procedure B. mp: 261 °C. <sup>1</sup>H NMR (500 MHz, DMSO-*d*<sub>6</sub>) δ 7.30–7.35 (m, 3H), 7.41 (m, 1H), 7.54 (m, 1H), 7.65 (br m, 1H), 7.87 (br m, 1H), 7.97 (dd, *J* = 1.2, 5.0 Hz, 1H), 8.16 (dd, *J* = 1.1, 3.8 Hz, 1H), 8.20 (dd, *J* = 1.4, 8.0 Hz, 1H), 8.81 (dd, *J* = 1.1, 8.4 Hz, 1H), 13.31 (br s, 1H), 14.14 (s, 1H). <sup>13</sup>C NMR (DMSO-*d*<sub>6</sub>) δ 111.74, 115.37, 118.37, 119.81, 122.52, 123.19, 123.65, 127.35, 128.68, 128.92, 130.95, 132.36, 133.46, 138.23, 140.44, 141.84, 150.99, 159.87. HRMS (*m/z*): [M+H]<sup>+</sup> calcd. for C<sub>18</sub>H<sub>14</sub>N<sub>3</sub>OS, 320.0852; found, 320.0880. Analytical RP-HPLC R<sub>t</sub> = 13.85 min.

*N*-(2-(1*H*-Benzimidazol-2-yl)phenyl)benzamide **13**

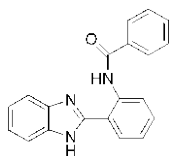

Benzoic acid gave **13** (19 mg, 25%) as a white solid according to General Procedure B. mp: 243-244 °C.; <sup>1</sup>H NMR (500 MHz, DMSO-*d*<sub>6</sub>) δ 7.33 (m, 3H), 7.57 (t, *J* = 8.6 Hz, 1H), 7.63 (d, *J* = 7.3 Hz, 1H), 7.69–7.72 (m, 3H), 7.80 (d, *J* = 7.4 Hz, 1H), 8.20 (dd, *J* = 1.3, 7.9 Hz, 1H), 8.26 (m, 2H), 8.95 (dd, *J* = 1.0, 8.4 Hz, 1H), 13.30 (s, 1H), 14.09 (s, 1H). <sup>13</sup>C NMR (DMSO-*d*<sub>6</sub>) δ 111.68, 115.67, 118.29, 119.98, 122.53, 123.20, 123.68, 127.36, 127.41, 129.03, 130.92, 132.15, 133.44, 134.86, 138.49, 141.89, 150.99, 164.99. HRMS (*m/z*): [M+H]<sup>+</sup> calcd. for C<sub>20</sub>H<sub>16</sub>N<sub>3</sub>O, 314.1288; found, 314.1278. Analytical RP-HPLC R<sub>t</sub> = 13.90 min.

*N*-(2-(1*H*-Benzimidazol-2-yl)phenyl)cyclopentanecarboxamide **14**

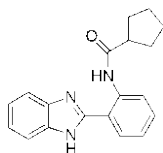

Cyclopentane carboxylic acid gave **14** (17 mg, 23%) as a white solid according to General Procedure B. mp: 208–209 °C. <sup>1</sup>H NMR (500 MHz, DMSO-*d*<sub>6</sub>) δ 1.65 (m, 2H), 1.74 (m, 2H), 1.89 (m, 2H), 2.02 (m, 2H), 2.95 (m, 1H), 7.23 (t, *J* = 8.3 Hz, 1H), 7.29 (br m, 2H), 7.47 (t, *J* = 8.5 Hz, 1H), 7.65 (br m, 2H), 8.11 (dd, *J* = 1.4, 7.9 Hz, 1H), 8.71 (dd, *J* = 1.0, 8.4 Hz, 1H), 13.07 (s, 1H), 13.17 (br s, 1H). <sup>13</sup>C NMR (DMSO-*d*<sub>6</sub>) δ 25.62, 29.86, 47.20, 111.54, 115.22, 118.48, 119.89, 122.27, 122.61, 123.38, 127.27, 130.67, 133.48, 138.56, 142.07, 150.92, 174.54. HRMS (*m/z*): [M+H]<sup>+</sup> calcd. for C<sub>19</sub>H<sub>20</sub>N<sub>3</sub>O, 306.1601; found 306.1594. Analytical RP-HPLC R<sub>t</sub> = 13.14 min.



*N*-(2-(1*H*-Benzimidazol-2-yl)phenyl)propionamide **15**

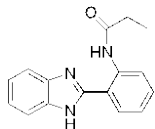

Propanoic acid gave **15** (11 mg, 17%) as a white solid according to General Procedure B. mp: 226–227 °C. <sup>1</sup>H NMR (500 MHz, DMSO-*d*<sub>6</sub>) δ 1.25 (t, *J* = 7.6 Hz, 3H), 2.53 (q, *J* = 7.6 Hz, 2H), 7.25 (m, 1H), 7.29 (m, 2H), 7.48 (t, *J* = 8.6 Hz, 1H), 7.66 (br m, 2H), 8.11 (dd, *J* = 1.4, 7.9 Hz, 1H), 8.71 (dd, *J* = 1.1, 8.4 Hz, 1H), 13.03 (s, 1H), 13.17 (br s, 1H). <sup>13</sup>C NMR (DMSO-*d*<sub>6</sub>) δ 9.58, 31.10, 111.70, 115.22, 118.48, 119.85, 122.68, 123.20, 123.30, 127.30, 130.68, 133.61, 138.42, 142.28, 150.89, 172.18. HRMS (*m/z*): [M+H]<sup>+</sup> calcd. for C<sub>16</sub>H<sub>16</sub>N<sub>3</sub>O, 266.1288; found, 266.1306. Analytical RP-HPLC R<sub>t</sub> = 14.42 min.

*N*-(2-(1*H*-Benzimidazol-2-yl)phenyl)-2-phenylacetamide **16**

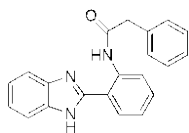

Phenylacetic acid gave **16** (35 mg, 45%) as a white solid according to General Procedure B. mp: 245 °C. <sup>1</sup>H NMR (500 MHz, DMSO-*d*<sub>6</sub>) δ 3.85 (s, 2H), 7.24 (m, 2H), 7.30 (dd, *J* = 3.2, 6.0 Hz, 2H), 7.33 (t, *J* = 7.6 Hz, 2H), 7.44–7.48 (m, 3H), 7.68 (br m, 2H), 8.10 (dd, *J* = 1.4, 8.0 Hz, 1H), 8.68 (dd, *J* = 1.1, 8.5 Hz, 1H), 13.17 (br s, 2H). <sup>13</sup>C NMR (DMSO-*d*<sub>6</sub>) δ 45.44, 111.03, 115.47, 117.52, 119.88, 122.83, 122.92, 126.89, 127.30, 128.57, 129.43, 130.63, 135.21, 135.44, 138.30, 142.29, 150.77, 169.67. HRMS (*m/z*): [M+H]<sup>+</sup> calcd. for C<sub>21</sub>H<sub>18</sub>N<sub>3</sub>O, 328.1444; found, 328.1444. Analytical RP-HPLC R<sub>t</sub> = 11.85 min.

## Synthesis and characterization of compounds 17 – 23

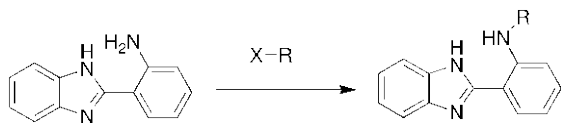

**General Procedure C.** A solution of 2-(1*H*-benzimidazol-2-yl)aniline DP 01095 (1 mmol) and the bromo- or chloro- substituted compound (0.4 mmol) in DMF (1 mL) was reacted in the microwave for 5 min using a dynamic control program with the temperature held at 150 °C, maximum power set at 300 W, and maximum pressure set at 150 psi. The solvent was evaporated and the residue dissolved in ethyl acetate, washed with water, saturated brine, and then water. The organic layer was dried over magnesium sulfate, and evaporated to give the crude product. This residue was purified by flash silica column chromatography eluting with 0–60% ethyl acetate in petroleum ether, and then recrystallized to give the desired product.

### 2-(1*H*-Benzimidazol-2-yl)-*N*-hexylaniline **17**

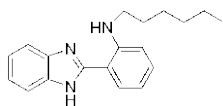

6-Bromohexane gave **17** (41 mg, 35%) as a white solid according to General Procedure C. mp: 111–112 °C. <sup>1</sup>H NMR (500 MHz, CDCl<sub>3</sub>) δ 0.92 (t, *J* = 7.0 Hz, 3H), 1.37 (m, 4H), 1.52 (m, 2H), 1.80 (m, 2H), 3.29 (t, *J* = 7.1 Hz, 2H), 6.68 (t, *J* = 7.5 Hz, 1H), 6.82 (d, *J* = 8.6 Hz, 1H), 7.24–7.27 (m, 2H), 7.29 (m, 1H), 7.56 (dd, *J* = 1.2, 7.8 Hz, 1H), 7.60 (br m, 2H), 9.23 (br s, 1H). <sup>13</sup>C NMR (CDCl<sub>3</sub>) δ 14.08, 22.64, 26.97, 29.04, 31.63, 43.49, 110.62, 111.82, 114.93, 122.61, 126.54, 131.27, 147.92, 152.01. HRMS (*m/z*): [M+H]<sup>+</sup> calcd. for C<sub>29</sub>H<sub>24</sub>N<sub>3</sub>, 294.1965; found, 294.1951. Analytical RP-HPLC R<sub>t</sub> = 16.10 min.

### 2-(1*H*-Benzimidazol-2-yl)-*N*-benzylaniline **18**

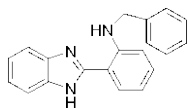

Benzyl bromide gave **18** (48 mg, 40%) as a white solid according to a modified General Procedure C (reaction was heated for 2 min at 90 °C instead of 5 min at 150 °C, as reaction at 150 °C for 5 min resulted in a di-alkylated product). mp: 158–160 °C. <sup>1</sup>H NMR (500 MHz, CDCl<sub>3</sub>) δ 4.62 (s, 2H), 6.68–6.73 (m, 2H), 7.22 (m, 1H), 7.25–7.27 (m, 3H), 7.34 (m, 2H), 7.43 (m, 2H), 7.59 (dd, *J* = 1.1, 7.6 Hz, 1H), 7.61 (br m, 2H), 9.45 (br s, 1H). <sup>13</sup>C NMR (CDCl<sub>3</sub>) δ 47.04, 110.81, 112.03, 115.18, 122.66, 126.49, 126.81, 126.86, 128.52, 131.25, 139.51, 148.01, 152.09. HRMS (*m/z*): [M+H]<sup>+</sup> calcd. for C<sub>20</sub>H<sub>18</sub>N<sub>3</sub>, 300.1495; found, 300.1496. Analytical RP-HPLC R<sub>t</sub> = 14.34 min.

### 2-(1*H*-Benzimidazol-2-yl)-*N*-(cyclopropylmethyl)aniline **19**

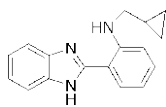

1-(Bromomethyl)cyclopropane gave **19** (32 mg, 30%) as an off white solid according to General Procedure C. mp: 153 °C. <sup>1</sup>H NMR (500 MHz, CDCl<sub>3</sub>) δ 0.34 (m, 2H), 0.60 (m, 2H), 1.24 (m, 1H), 3.17 (d, *J* = 6.8 Hz, 2H), 6.68 (t, *J* = 7.5 Hz, 1H), 6.79 (d, *J* = 8.3 Hz, 1H), 7.24–7.26 (m, 2H), 7.29 (m, 1H), 7.54 (dd, *J* = 1.5, 7.8 Hz, 1H), 7.60 (br m, 2H), 9.15 (br s, 1H). <sup>13</sup>C NMR (CDCl<sub>3</sub>) δ 3.63, 10.67, 48.00, 110.63, 111.55, 114.80, 122.54, 126.70, 131.25, 148.13, 152.16. HRMS (*m/z*): [M+H]<sup>+</sup> calcd. for C<sub>17</sub>H<sub>18</sub>N<sub>3</sub>, 264.1495; found, 264.1505. Analytical RP-HPLC R<sub>t</sub> = 12.92 min.

### 2-(1*H*-Benzimidazol-2-yl)-*N*-isopentylaniline **20**

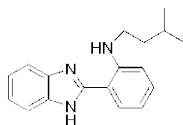

1-Bromo-3-methyl butane gave **20** (38 mg, 34%) as a white solid according to General Procedure C. mp: 144–146 °C. <sup>1</sup>H NMR (500 MHz, CDCl<sub>3</sub>) δ 0.99 (d, *J* = 6.6 Hz, 6H), 1.68 (q, *J* = 7.6 Hz, 2H), 1.84 (m, 1H), 3.30 (t, *J* = 7.3 Hz, 2H), 6.67 (t, *J* = 7.5 Hz, 1H), 6.79 (d, *J* = 8.5 Hz, 1H), 7.23 – 7.28 (m, 2H), 7.30 (m, 1H), 7.53 (dd, *J* = 1.5, 7.8 Hz, 1H), 7.59 (br m, 2H), 9.10 (br s, 1H). <sup>13</sup>C NMR (CDCl<sub>3</sub>) δ 22.64, 26.14, 38.06, 41.40, 110.40, 111.34, 114.52, 122.54, 126.59, 131.29, 148.23, 152.19. HRMS (*m/z*): [M+H]<sup>+</sup> calcd. for C<sub>18</sub>H<sub>22</sub>N<sub>3</sub>, 280.1808; found, 280.1819. Analytical RP-HPLC R<sub>t</sub> = 13.14 min.

### 2-(1*H*-Benzimidazol-2-yl)-*N*-propylaniline **21**

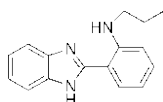

1-Bromopropane gave **21** (33 mg, 33%) as a white solid according to General Procedure C. mp: 136–137 °C. <sup>1</sup>H NMR (500 MHz, CDCl<sub>3</sub>) δ 1.09 (t, *J* = 7.4 Hz, 3H), 1.80 (m, 2H), 3.27 (t, *J* = 7.1 Hz, 2H), 6.67 (t, *J* = 7.5 Hz, 1H), 6.80 (d, *J* = 8.4 Hz, 1H), 7.23 – 7.27 (m, 2H), 7.29 (m, 1H), 7.53 (dd, *J* = 1.5, 7.8 Hz, 1H), 7.60 (br m, 2H), 9.11 (br s, 1H). <sup>13</sup>C NMR (CDCl<sub>3</sub>) δ 11.85, 22.41, 45.02, 110.43, 111.47, 114.60, 122.56, 126.56, 131.28, 148.20, 152.16. HRMS (*m/z*): [M+H]<sup>+</sup> calcd. for C<sub>16</sub>H<sub>18</sub>N<sub>3</sub>, 252.1495; found, 252.1499. Analytical RP-HPLC R<sub>t</sub> = 14.42 min.

### 2-(1*H*-Benzimidazol-2-yl)-*N*-(2-morpholinoethyl)aniline **22**

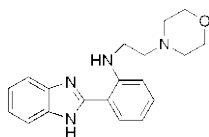

*N*-(2-Chloroethyl)morpholine hydrochloride gave **22** (37 mg, 29%) as a pale yellow solid according to a modified General Procedure C (0.5 mmol of DIEA was added to the reaction mixture to neutralize the hydrochloride salt starting material) (purified by flash silica column chromatography eluting with 0–10% methanol in dichloromethane). mp: 109–111 °C.; <sup>1</sup>H NMR (500 MHz, CDCl<sub>3</sub>) δ 2.62 (m, 4H), 2.79 (t, *J* = 6.5 Hz, 2H), 3.44 (t, *J* = 6.5 Hz, 2H), 3.81 (t, *J* = 9.3 Hz, 4H), 6.70 (t, *J* = 7.4 Hz, 1H), 6.80 (d, *J*

= 8.3 Hz, 1H), 7.23 – 7.27 (m, 2H), 7.31 (m, 1H), 7.56 (dd,  $J = 1.5, 7.8$  Hz, 1H), 7.60 (br m, 2H), 8.94 (br s, 1H).  $^{13}\text{C}$  NMR ( $\text{CDCl}_3$ )  $\delta$  40.10, 40.94, 53.52, 57.07, 67.04, 111.13, 111.52, 115.04, 122.60, 126.80, 131.29, 147.89, 152.00. HRMS ( $m/z$ ):  $[\text{M}+\text{H}]^+$  calcd. for  $\text{C}_{19}\text{H}_{23}\text{N}_4\text{O}$ , 323.1866; found, 323.1887. Analytical RP-HPLC  $R_t = 8.02$  min.

*N*-(2-(1*H*-Benzimidazol-2-yl)phenyl)pyridin-4-amine **23**

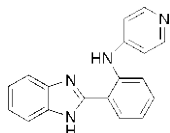

4-Chloropyridine hydrochloride gave **23** (6 mg, 5%) as a pale yellow solid according to a modified General Procedure C (0.5 mmol of DIEA was added to the reaction mixture to neutralize the hydrochloride salt starting material) (purified by flash silica column chromatography eluting with 0 – 10% methanol in dichloromethane). mp: 275–277 °C.  $^1\text{H}$  NMR (500 MHz,  $\text{DMSO}-d_6$ )  $\delta$  7.16–7.20 (m, 3H), 7.26 (m, 2H), 7.47 (t,  $J = 7.7$  Hz, 1H), 7.57 (d,  $J = 7.7$  Hz, 1H), 7.67 (dd,  $J = 0.9, 8.3$  Hz, 1H), 7.76 (d,  $J = 7.6$  Hz, 1H), 8.10 (dd,  $J = 1.4, 7.9$  Hz, 1H), 8.33 (d,  $J = 5.6$  Hz, 2H), 11.50 (s, 1H), 13.08 (s, 1H).  $^{13}\text{C}$  NMR ( $\text{DMSO}-d_6$ )  $\delta$  111.43, 116.43, 118.23, 118.63, 121.31, 122.07, 123.24, 128.50, 130.62, 133.55, 140.09, 142.33, 148.77, 150.35, 151.02. HRMS ( $m/z$ ):  $[\text{M}+\text{H}]^+$  calcd. for  $\text{C}_{18}\text{H}_{15}\text{N}_4$ , 287.1291; found, 287.1295. Analytical RP-HPLC  $R_t = 7.20$  min.

## SUPPLEMENTAL REFERENCES

References not listed here can be found in the reference list in the main text.

Baraldia, P. G., Cacciaria, B., Romagnolia, R., Varanib, K., Merighib, S., Gessib, S., Boreab, P. A., Leungc, E., Hickeyd, S. L., Spallutoe, G. (2000) Synthesis and preliminary biological evaluation of [<sup>3</sup>H]-MRE-3008-F20: the first high affinity radioligand antagonist for the human A<sub>3</sub> adenosine receptors, *Bioorg. Med. Chem. Lett.* 10, 209-211.

Christopoulos, A., Parsons, A. M., Lew, M. J., El-Fakahany, E. E. (1999) The assessment of antagonist potency under conditions of transient response kinetics, *Eur. J. Pharmacol.* 382, 217-27.

Cole, A. G., Stauffer, T. M., Rokosz, L. L., Metzger, A., Dillard, L. W., Zeng, W., Henderson, I. (2009) Synthesis of 2-amino-5-benzoyl-4-(2-furyl)thiazoles as adenosine A<sub>2A</sub> receptor antagonists, *Bioorg. Med. Chem. Lett.* 19, 378-381.

Jung, K.Y., Kim, S. K., Gao, Z. G., Gross, A. S., Melman, N., Jacobson, K. A., Kim, Y. C. (2004) Structure-activity relationships of thiazole and thiadiazole derivatives as potent and selective human adenosine A<sub>3</sub> receptor antagonists, *Bioorg. Med. Chem.* 12, 613-623.

Lenzi, O., Colotta, V., Catarzi, D., Varano, F., Filacchioni, G., Martini, C., Trincavelli, L., Ciampi, O., Varani, K., Marighetti, F., Morizzo, E., Moro, S. (2006) 4-amido-2-aryl-1,2,4-triazolo[4,3-*a*]quinoxalin-1-ones as new potent and selective human A<sub>3</sub> adenosine receptor antagonists. Synthesis, pharmacological evaluation, and ligand-receptor modeling studies, *J. Med. Chem.* 49, 3916-3925.

Lenzi, O., Colotta, V., Catarzi, D., Varano, F., Poli, D., Filacchioni, G., Varani, K., Vincenzi, F., Borea, P. A., Paoletta, S., Morizzo, E., Moro, S. (2009) 2-Phenylpyrazolo 4,3-d pyrimidin-7-one as a New Scaffold To Obtain Potent and Selective Human A<sub>3</sub> Adenosine Receptor Antagonists: New Insights into the Receptor-Antagonist Recognition, *J. Med. Chem.* 52, 7640-7652.

Li, A.H., Moro, S., Melman, N., Ji, X.D., Jacobson, K.A. (1998) Structure-activity relationships and molecular modeling of 3,5-diacyl-2,4-dialkylpyridine derivatives as selective A<sub>3</sub> adenosine receptor antagonists, *J. Med. Chem.* 41, 3186-3201.

Okamura, T., Kurogi, Y., Hashimoto, K., Sato, S., Nishikawa, H., Kiryu, K., Nagao, Y. (2004) Structure-activity relationships of adenosine A<sub>3</sub> receptor ligands: new potential therapy for the treatment of glaucoma, *Bioorg. Med. Chem. Lett.* *14*, 3775-3779.

Ozola, V., Thorand, M., Diekmann, M., Qurishi, R., Schumacher, B., Jacobson, K. A., Müller, C. E. (2003) 2-Phenylimidazo[2,1-*i*]purin-5-ones: Structure–Activity relationships and characterization of potent and selective inverse agonists at Human A<sub>3</sub> adenosine receptors, *Bioorg. Med. Chem.* *11*, 347-356.

Press, N. J., Keller, T. H., Tranter, P., Beer, D., Jones, K., Faessler, A., Heng, R., Lewis, C., Howe, T., Gedeck, P., Mazzoni, L., Fozard, J. R. (2004) New highly potent and selective adenosine A<sub>3</sub> receptor antagonists, *Curr. Top. Med. Chem.* *4*, 863-870.

Saki, M., Tsumuki, H., Nonaka, H., Shimada, J. & Ichimura, M. (2002) KF26777 (2-(4-bromophenyl)-7,8-dihydro-4-propyl-1H-imidazo 2,1-*i*-purin-5(4H)-one dihydrochloride), a new potent and selective adenosine A<sub>3</sub> receptor antagonist, *Eur. J. Pharmacol.* *444*, 133-141.

Scheiff, A. B., Yerande, S. G., El-Tayeb, A., Li, W., Inamdar, G. S., Vasu, K. K., Sudarsanam, V., Müller, C. E. (2010) 2-Amino-5-benzoyl-4-phenylthiazoles: Development of potent and selective adenosine A<sub>1</sub> receptor antagonists. *Bioorg. Med. Chem.* *18*, 2195-2203.

van Muijlwijk-Koezen, J. E., Timmerman, H., Link, R., van der Goot, H., IJzerman, A.P. (1998) A novel class of adenosine A<sub>3</sub> receptor ligands. 2. Structure affinity profile of a series of isoquinoline and quinazoline compounds *J. Med. Chem.* *41*, 3994-4000.

van Muijlwijk-Koezen, J.E., Timmerman, H., van der Goot, H., Menge, W. M., Frijtag Von Drabbe Künzel, J., de Groote, M., IJzerman, A.P. (2000) Isoquinoline and quinazoline urea analogues as antagonists for the human adenosine A<sub>3</sub> receptor, *J. Med. Chem.* *43*, 2227-2238.

van Rhee, A. M., Jiang, J.L., Melman, N., Olah, M. E., Stiles, G. L., Jacobson, K. A. (1996) Interaction of 1,4-dihydropyridine and pyridine derivatives with adenosine receptors: selectivity for A<sub>3</sub> receptors, *J. Med. Chem.* *39*, 2980-2989
